# Supplementary material for: Eltrombopag directly inhibits BAX and prevents cell death
Source: PubMed Central journal article supplement (PMC7892824; doi:10.1038/s41467-021-21224-1), 2021-02-18
Supplement: 41467_2021_21224_MOESM2_ESM.pdf [file 41467_2021_21224_MOESM2_ESM.pdf]

**Editorial Note:** This manuscript has been previously reviewed at another journal that is not operating a transparent peer review scheme. This document only contains reviewer comments and rebuttal letters for versions considered at *Nature Communications*.
