# Supplementary material for: Eltrombopag directly inhibits BAX and prevents cell death
Source: PubMed Central journal article supplement (PMC7892824; doi:10.1038/s41467-021-21224-1), 2021-02-18
Supplement: 41467_2021_21224_MOESM3_ESM.pdf [file 41467_2021_21224_MOESM3_ESM.pdf]

## Reporting Summary

Nature Research wishes to improve the reproducibility of the work that we publish. This form provides structure for consistency and transparency in reporting. For further information on Nature Research policies, see our [Editorial Policies](#) and the [Editorial Policy Checklist](#).

### Statistics

For all statistical analyses, confirm that the following items are present in the figure legend, table legend, main text, or Methods section.

n/a Confirmed

- |                                     |                                     |                                                                                                                                                                                                                                                            |
|-------------------------------------|-------------------------------------|------------------------------------------------------------------------------------------------------------------------------------------------------------------------------------------------------------------------------------------------------------|
| <input type="checkbox"/>            | <input checked="" type="checkbox"/> | The exact sample size ( $n$ ) for each experimental group/condition, given as a discrete number and unit of measurement                                                                                                                                    |
| <input type="checkbox"/>            | <input checked="" type="checkbox"/> | A statement on whether measurements were taken from distinct samples or whether the same sample was measured repeatedly                                                                                                                                    |
| <input type="checkbox"/>            | <input checked="" type="checkbox"/> | The statistical test(s) used AND whether they are one- or two-sided<br><i>Only common tests should be described solely by name; describe more complex techniques in the Methods section.</i>                                                               |
| <input type="checkbox"/>            | <input checked="" type="checkbox"/> | A description of all covariates tested                                                                                                                                                                                                                     |
| <input type="checkbox"/>            | <input checked="" type="checkbox"/> | A description of any assumptions or corrections, such as tests of normality and adjustment for multiple comparisons                                                                                                                                        |
| <input type="checkbox"/>            | <input checked="" type="checkbox"/> | A full description of the statistical parameters including central tendency (e.g. means) or other basic estimates (e.g. regression coefficient) AND variation (e.g. standard deviation) or associated estimates of uncertainty (e.g. confidence intervals) |
| <input type="checkbox"/>            | <input checked="" type="checkbox"/> | For null hypothesis testing, the test statistic (e.g. $F$ , $t$ , $r$ ) with confidence intervals, effect sizes, degrees of freedom and $P$ value noted<br><i>Give <math>P</math> values as exact values whenever suitable.</i>                            |
| <input checked="" type="checkbox"/> | <input type="checkbox"/>            | For Bayesian analysis, information on the choice of priors and Markov chain Monte Carlo settings                                                                                                                                                           |
| <input checked="" type="checkbox"/> | <input type="checkbox"/>            | For hierarchical and complex designs, identification of the appropriate level for tests and full reporting of outcomes                                                                                                                                     |
| <input checked="" type="checkbox"/> | <input type="checkbox"/>            | Estimates of effect sizes (e.g. Cohen's $d$ , Pearson's $r$ ), indicating how they were calculated                                                                                                                                                         |

*Our web collection on [statistics for biologists](#) contains articles on many of the points above.*

### Software and code

Policy information about [availability of computer code](#)

Data collection

Modeling data were collected and analyzed with Schrodinger software suite (Releases 2016-2019, Schrodinger, LLC) and Pymol (Version 2.3, The PyMOL Molecular Graphics System, Schrodinger, LLC). NMR data were collected and processed with Topspin software (Version 2.1, 2016, Bruker). MST Data was acquired NanoTemper MO.Control 2 (2019, NanoTemper).

Data analysis

Data analysis and statistical comparisons were performed by Graphpad Prism 7.0-9.0 software. NMR data were analyzed with NMRView v.8.0.3. Structural and small molecule data were analyzed with modules SiteMap, GLIDE, EPIC, LIGPREP, MAESTRO, DESMOND, IFD, MM-GBSA using Schrodinger Software Suite version 2016-2019. Western blot data were analyzed with Image Studio 3.1. MST Data was analyzed using NanoTemper MO.Affinity Analysis 3 (2019, NanoTemper).

For manuscripts utilizing custom algorithms or software that are central to the research but not yet described in published literature, software must be made available to editors and reviewers. We strongly encourage code deposition in a community repository (e.g. GitHub). See the Nature Research [guidelines for submitting code & software](#) for further information.

### Data

Policy information about [availability of data](#)

All manuscripts must include a [data availability statement](#). This statement should provide the following information, where applicable:

- Accession codes, unique identifiers, or web links for publicly available datasets
- A list of figures that have associated raw data
- A description of any restrictions on data availability

All data generated or analyzed during this study are included in this published article and its supplementary information files and are available from the corresponding author on a reasonable request. Source data are provided with this paper. The following publicly available data sets were used in the production of this manuscript:

## Field-specific reporting

Please select the one below that is the best fit for your research. If you are not sure, read the appropriate sections before making your selection.

Life sciences  Behavioural & social sciences  Ecological, evolutionary & environmental sciences

For a reference copy of the document with all sections, see [nature.com/documents/nr-reporting-summary-flat.pdf](https://nature.com/documents/nr-reporting-summary-flat.pdf)

## Life sciences study design

All studies must disclose on these points even when the disclosure is negative.

|                 |                                                                                                                                                                                                                                                                                                                                                                                                     |
|-----------------|-----------------------------------------------------------------------------------------------------------------------------------------------------------------------------------------------------------------------------------------------------------------------------------------------------------------------------------------------------------------------------------------------------|
| Sample size     | Sample size were designed based on previous experience with assays on related projects (Garner et al. Nat. Chem. Bio. 2019 DOI: 10.1038/s41589-018-0223-0, Amgalan et al. Nat. Cancer 2020 DOI: 10.1038/s43013-020-0039-1) and variability of the response deviating from the mean as presented in the graphs and figure legends. Sample sizes and statistical data are reported in figure legends. |
| Data exclusions | No data were excluded from the analyses.                                                                                                                                                                                                                                                                                                                                                            |
| Replication     | Experimental findings were replicated at least 2 or more times as indicated in the figure legends and replication was successful at all attempts.                                                                                                                                                                                                                                                   |
| Randomization   | Allocation was random.                                                                                                                                                                                                                                                                                                                                                                              |
| Blinding        | Blinding was not required in this study as all comparisons were made using quantitative analysis of computational, biochemical, or cellular data with no animal or human subjects and randomized group allocation was not performed.                                                                                                                                                                |

## Reporting for specific materials, systems and methods

We require information from authors about some types of materials, experimental systems and methods used in many studies. Here, indicate whether each material, system or method listed is relevant to your study. If you are not sure if a list item applies to your research, read the appropriate section before selecting a response.

### Materials & experimental systems

| n/a                                 | Involved in the study                                     |
|-------------------------------------|-----------------------------------------------------------|
| <input type="checkbox"/>            | <input checked="" type="checkbox"/> Antibodies            |
| <input type="checkbox"/>            | <input checked="" type="checkbox"/> Eukaryotic cell lines |
| <input checked="" type="checkbox"/> | <input type="checkbox"/> Palaeontology and archaeology    |
| <input checked="" type="checkbox"/> | <input type="checkbox"/> Animals and other organisms      |
| <input checked="" type="checkbox"/> | <input type="checkbox"/> Human research participants      |
| <input checked="" type="checkbox"/> | <input type="checkbox"/> Clinical data                    |
| <input checked="" type="checkbox"/> | <input type="checkbox"/> Dual use research of concern     |

### Methods

| n/a                                 | Involved in the study                           |
|-------------------------------------|-------------------------------------------------|
| <input checked="" type="checkbox"/> | <input type="checkbox"/> ChIP-seq               |
| <input checked="" type="checkbox"/> | <input type="checkbox"/> Flow cytometry         |
| <input checked="" type="checkbox"/> | <input type="checkbox"/> MRI-based neuroimaging |

## Antibodies

|                 |                                                                                                                                                                                                                                                                                                                                                                                                                                                                                                                                                                                                                                                                                                                                                                                                                                                                                     |
|-----------------|-------------------------------------------------------------------------------------------------------------------------------------------------------------------------------------------------------------------------------------------------------------------------------------------------------------------------------------------------------------------------------------------------------------------------------------------------------------------------------------------------------------------------------------------------------------------------------------------------------------------------------------------------------------------------------------------------------------------------------------------------------------------------------------------------------------------------------------------------------------------------------------|
| Antibodies used | 6A7 mouse monoclonal antibody (Santa Cruz Cat. #sc-23959), 15 µL per reaction<br>BAX monoclonal antibody (Cell Signaling Cat. #2772) 1:1000 dilution for western blot, 1:100 dilution for imaging<br>anti-BAK (Millipore Cat. #06-536) 1:1000 dilution<br>anti-β-Actin (Sigma Cat. #A1978) 1:5000 dilution<br>anti-VDAC (Cell Signaling Cat. #4661) 1:1000 dilution<br>anti-TOMM20 (Sigma Cat. #ST1705) 1:100 dilution<br>IRDye800-conjugated goat anti-rabbit IgG (LI-COR Biosciences Cat. #925-32211) 1:5000 dilution<br>IRDye800-conjugated goat anti-mouse IgG (LI-COR Biosciences Cat. #925-32210) 1:5000 dilution<br>Goat anti-Rabbit IgG (H+L) Cross-Adsorbed Secondary Antibody, Alexa Fluor 488 (ThermoFisher Cat. #11008) 1:500 dilution<br>Goat anti-Mouse IgG (H+L) Highly Cross-Adsorbed Secondary Antibody, Alexa Fluor 546 (ThermoFisher Cat. #11030) 1:500 dilution |
| Validation      | 6A7 mouse monoclonal antibody was validated in HT-1080 , BJAB , Ramos, and MDA-MB-231 whole cell lysates by Santa Cruz. Sample PMID: 30049712<br>BAX monoclonal antibody was validated in extracts from HeLa cells by Cell Signaling. Sample PMID: 31899991<br>anti-BAK was validated in extracts from A431, C2C12, HEK293, and HepG2 among other cell and tissue samples by Millipore. Sample PMID: 26231047<br>anti-β-Actin was validated in extracts from HeLa, JURKAT, COS7, and NIH-3T3 among other cell samples by Sigma. Sample PMID: 22109529                                                                                                                                                                                                                                                                                                                               |

anti-VDAC was validated in extracts from MCF-7, Jurkat, HCl-H441, and Hek293 among other cell samples by Cell Signaling. Sample PMID: 32978498

anti-TOMM20 was validated in extracts from HeLa, PC-12, and NIH-3T3 cell samples by Millipore. Sample PMID: 27771514

## Eukaryotic cell lines

---

### Policy information about [cell lines](#)

Cell line source(s)

NIH-3T3 (referred to as 3T3), BAK<sup>-/-</sup> Mouse Embryonic Fibroblasts (referred to as BAKKO MEFs), and BAX<sup>-/-</sup> Mouse Embryonic Fibroblasts (referred to as BAXKO MEFs) were purchased from ATCC.

Authentication

Cell lines were authenticated from their vendor. ATCC uses morphology, karyotyping, and PCR based approaches to confirm the identity of human and mouse cell lines and to rule out both intra- and interspecies contamination.

Mycoplasma contamination

All cell lines were tested negative for mycoplasma contamination.

Commonly misidentified lines  
(See [ICLAC](#) register)

No commonly misidentified lines were used in our study.
